# Supplementary material for: A high quality method for hemolymph collection from honeybee larvae
Source: PubMed Central journal article supplement (PMC7302910; doi:10.1371/journal.pone.0234637), 2020-06-18
Supplement: pone.0234637.s001.pdf [file pone.0234637.s001.pdf]

## Bradford analyses

### Summary

| <i>Groups</i> | <i>Count</i> | <i>Sum</i> | <i>Average</i> | <i>Variance</i> |
|---------------|--------------|------------|----------------|-----------------|
| Column 1      | 15           | 432833.3   | 28855.55556    | 7.42E^08        |
| Column 2      | 15           | 412666.7   | 27511.11111    | 4.15E^08        |
| Column 3      | 15           | 620333.3   | 41355.55556    | 1.04E^08        |
| Column 4      | 15           | 617583.3   | 41172.22222    | 59085780        |

### ANOVA

| <i>Source of variation</i> | <i>SS</i> | <i>df</i> | <i>MS</i>   | <i>F</i> | <i>P-value</i> | <i>F crit</i> |
|----------------------------|-----------|-----------|-------------|----------|----------------|---------------|
| Between Groups             | 2.58E^09  | 3         | 860107523.1 | 2.605489 | 0.060694       | 2.769431      |
| Within Groups              | 1.85E^10  | 56        | 330113657.4 |          |                |               |
| Total                      | 2.11E^10  | 59        |             |          |                |               |

### Completely randomized design

Data:

```

=====
Treatments   1ª Rep.   2ª Rep.   3ª Rep.   4ª Rep.   5ª Rep.
-----
Treatment 1  -66250.000  21833.0000  34750.0000  36583.0000  33167.0000
Treatment 2  -43917.000  25333.0000  32833.0000  37250.0000  37750.0000
Treatment 3   66417.0000  34083.0000  59417.0000  26500.0000  40583.0000
Treatment 4   33917.0000  46250.0000  45083.0000  45833.0000  39250.0000
=====

Treatments   6ª Rep.   7ª Rep.   8ª Rep.   9ª Rep.   10ª Rep.
-----
Treatment 1   35417.0000  50500.0000  39000.0000  36167.0000  29917.0000
Treatment 2   40917.0000  41167.0000  30250.0000  29917.0000  28583.0000
Treatment 3   34167.0000  41500.0000  29750.0000  45500.0000  43750.0000
Treatment 4   40333.0000  38500.0000  44083.0000  44500.0000  38250.0000
=====

Treatments   11ª Rep.  12ª Rep.  13ª Rep.  14ª Rep.  15ª Rep.
-----
Treatment 1   40000.0000  40167.0000  23250.0000  41333.0000  37000.0000
    
```

|             |            |            |            |            |            |
|-------------|------------|------------|------------|------------|------------|
| Treatment 2 | 29083.0000 | 34333.0000 | 25500.0000 | 29667.0000 | 34000.0000 |
| Treatment 3 | 41333.0000 | 37167.0000 | 41083.0000 | 39333.0000 | 39750.0000 |
| Treatment 4 | 60250.0000 | 35667.0000 | 29667.0000 | 30083.0000 | 45917.0000 |

Descriptive treatments statistics :

| Treatments  | Average    | Variance   | SD         | SEM        |
|-------------|------------|------------|------------|------------|
| Treatment 1 | 28855.6000 | 741574703  | 27231.8693 | 7031.23841 |
| Treatment 2 | 27511.0667 | 415369254  | 20380.6097 | 5262.25081 |
| Treatment 3 | 41355.5333 | 104432032  | 10219.1992 | 2638.58588 |
| Treatment 4 | 41172.2000 | 59084872.0 | 7686.66846 | 1984.68926 |

Analysis of variance.

|            | df | SS           | MQ           | F      | P      |
|------------|----|--------------|--------------|--------|--------|
| Treatments | 3  | 2580315641.7 | 860105213.91 | 2.61NS | 0.0607 |
| Residual   | 56 | 18486452045  | 330115215.08 | -      | -      |
| Total      | 59 | 21066767686  | -            | -      | -      |

Average.....: 34723.600  
SD.....: 18169.073  
standard error .....: 4691.2345  
coefficient of variation: 52.324854

Teste de Tukey

| Treatment   | Variable 1  |
|-------------|-------------|
| Treatment 3 | 41355.533 a |
| Treatment 4 | 41172.200 a |
| Treatment 1 | 28855.600 a |
| Treatment 2 | 27511.067 a |

Significant difference (5%) = 17567.1630
