# Supplementary material for: A high quality method for hemolymph collection from honeybee larvae
Source: PubMed Central journal article supplement (PMC7302910; doi:10.1371/journal.pone.0234637), 2020-06-18
Supplement: pone.0234637.s003.pdf [file pone.0234637.s003.pdf]

## Turbidity analyses

### Summary

| <i>Groups</i> | <i>Count</i> | <i>Sum</i> | <i>Average</i> | <i>Variance</i> |
|---------------|--------------|------------|----------------|-----------------|
| Column 1      | 30           | 719750     | 23991.67       | 7351221         |
| Column 2      | 30           | 701750     | 23391.67       | 7119325         |
| Column 3      | 30           | 708000     | 23600          | 12640517        |
| Column 4      | 30           | 5296250    | 176541.7       | 64077945        |
| Column 5      | 30           | 5376500    | 179216.7       | 47291954        |
| Column 6      | 30           | 5300250    | 176675         | 28707543        |
| Column 7      | 30           | 3606000    | 120200         | 40928448        |
| Column 8      | 30           | 3660000    | 122000         | 67465517        |
| Column 9      | 30           | 3628500    | 120950         | 22294828        |
| Column 10     | 30           | 2360500    | 78683.33       | 40340230        |
| Column 11     | 30           | 2408000    | 80266.67       | 33072989        |
| Column 12     | 30           | 2354250    | 78475          | 45919612        |

### Anova

| <i>Source of variation</i> | <i>SS</i> | <i>df</i> | <i>MS</i> | <i>F</i> | <i>P-value</i> | <i>F crit</i> |
|----------------------------|-----------|-----------|-----------|----------|----------------|---------------|
| Between Groups             | 1.14E^12  | 11        | 1.04E^11  | 2991.254 | <0.0001        | 1.816209      |
| Within Groups              | 1.21E^10  | 348       | 34767511  |          |                |               |
| Total                      | 1.16E^12  | 359       |           |          |                |               |

### Completely randomized design

Data:

| Treatments  | 1 <sup>a</sup> Rep. | 2 <sup>a</sup> Rep. | 3 <sup>a</sup> Rep. | 4 <sup>a</sup> Rep. | 5 <sup>a</sup> Rep. |
|-------------|---------------------|---------------------|---------------------|---------------------|---------------------|
| Treatment 1 | 24750.00            | 20250.00            | 20750.00            | 26250.00            | 24500.00            |
| Treatment 2 | 20750.00            | 27750.00            | 22250.00            | 27500.00            | 24750.00            |
| Treatment 3 | 22250.00            | 24500.00            | 17500.00            | 18000.00            | 26500.00            |
| Treatment 4 | 190000.0            | 166750.0            | 168000.0            | 182500.0            | 184500.0            |
| Treatment 5 | 191000.0            | 195000.0            | 186250.0            | 171250.0            | 176750.0            |
| Treatment 6 | 185000.0            | 176250.0            | 180250.0            | 183500.0            | 181750.0            |
| Treatment 7 | 123250.0            | 112250.0            | 125750.0            | 124500.0            | 111250.0            |
| Treatment 8 | 133500.0            | 119000.0            | 128000.0            | 114500.0            | 128750.0            |
| Treatment 9 | 127500.0            | 124750.0            | 116750.0            | 118500.0            | 128250.0            |

|              |          |          |          |          |          |
|--------------|----------|----------|----------|----------|----------|
| Treatment 10 | 84000.00 | 85000.00 | 85250.00 | 90000.00 | 87750.00 |
| Treatment 11 | 75250.00 | 82500.00 | 92250.00 | 81000.00 | 83500.00 |
| Treatment 12 | 84750.00 | 91500.00 | 82000.00 | 74250.00 | 72750.00 |

| Treatments   | 6 <sup>a</sup> Rep. | 7 <sup>a</sup> Rep. | 8 <sup>a</sup> Rep. | 9 <sup>a</sup> Rep. | 10 <sup>a</sup> Rep. |
|--------------|---------------------|---------------------|---------------------|---------------------|----------------------|
| Treatment 1  | 22750.00            | 20500.00            | 25750.00            | 19750.00            | 21250.00             |
| Treatment 2  | 19750.00            | 26500.00            | 20750.00            | 22250.00            | 21500.00             |
| Treatment 3  | 26500.00            | 25250.00            | 22250.00            | 19000.00            | 23750.00             |
| Treatment 4  | 182750.0            | 191000.0            | 170250.0            | 172500.0            | 174500.0             |
| Treatment 5  | 177750.0            | 173750.0            | 178000.0            | 190500.0            | 184250.0             |
| Treatment 6  | 179750.0            | 173750.0            | 172500.0            | 175000.0            | 172000.0             |
| Treatment 7  | 118000.0            | 119750.0            | 128250.0            | 112000.0            | 111750.0             |
| Treatment 8  | 120250.0            | 112750.0            | 108000.0            | 123750.0            | 119500.0             |
| Treatment 9  | 126750.0            | 122000.0            | 119000.0            | 118500.0            | 118750.0             |
| Treatment 10 | 78250.00            | 73500.00            | 77250.00            | 80500.00            | 74000.00             |
| Treatment 11 | 90000.00            | 89500.00            | 90750.00            | 82250.00            | 79000.00             |
| Treatment 12 | 80500.00            | 81000.00            | 79250.00            | 86500.00            | 89250.00             |

| Treatments   | 11 <sup>a</sup> Rep. | 12 <sup>a</sup> Rep. | 13 <sup>a</sup> Rep. | 14 <sup>a</sup> Rep. | 15 <sup>a</sup> Rep. |
|--------------|----------------------|----------------------|----------------------|----------------------|----------------------|
| Treatment 1  | 28750.00             | 23000.00             | 26250.00             | 27000.00             | 22750.00             |
| Treatment 2  | 20000.00             | 21750.00             | 25500.00             | 20750.00             | 21000.00             |
| Treatment 3  | 15250.00             | 27000.00             | 19250.00             | 28750.00             | 27000.00             |
| Treatment 4  | 180250.0             | 176750.0             | 171250.0             | 185000.0             | 180000.0             |
| Treatment 5  | 187500.0             | 183500.0             | 182250.0             | 177250.0             | 183750.0             |
| Treatment 6  | 182250.0             | 174500.0             | 180750.0             | 170750.0             | 174750.0             |
| Treatment 7  | 122250.0             | 127750.0             | 112250.0             | 129250.0             | 123500.0             |
| Treatment 8  | 110500.0             | 120500.0             | 129750.0             | 124250.0             | 132500.0             |
| Treatment 9  | 129250.0             | 125500.0             | 121500.0             | 115000.0             | 117000.0             |
| Treatment 10 | 86000.00             | 80250.00             | 69000.00             | 77000.00             | 85500.00             |
| Treatment 11 | 80500.00             | 78500.00             | 83250.00             | 81750.00             | 82000.00             |
| Treatment 12 | 78750.00             | 73000.00             | 64750.00             | 69000.00             | 86500.00             |

| Treatments   | 16 <sup>a</sup> Rep. | 17 <sup>a</sup> Rep. | 18 <sup>a</sup> Rep. | 19 <sup>a</sup> Rep. | 20 <sup>a</sup> Rep. |
|--------------|----------------------|----------------------|----------------------|----------------------|----------------------|
| Treatment 1  | 24750.00             | 20250.00             | 21750.00             | 28250.00             | 26500.00             |
| Treatment 2  | 28250.00             | 26000.00             | 22250.00             | 26000.00             | 24250.00             |
| Treatment 3  | 24000.00             | 28750.00             | 22750.00             | 22500.00             | 21500.00             |
| Treatment 4  | 178250.0             | 168500.0             | 172750.0             | 186500.0             | 180750.0             |
| Treatment 5  | 183000.0             | 167000.0             | 169750.0             | 173500.0             | 174000.0             |
| Treatment 6  | 172500.0             | 171000.0             | 179000.0             | 182750.0             | 164250.0             |
| Treatment 7  | 112000.0             | 121250.0             | 122750.0             | 114500.0             | 115250.0             |
| Treatment 8  | 121750.0             | 126250.0             | 124500.0             | 112750.0             | 128750.0             |
| Treatment 9  | 124500.0             | 125250.0             | 118250.0             | 112750.0             | 124500.0             |
| Treatment 10 | 74000.00             | 68000.00             | 70750.00             | 76250.00             | 84500.00             |
| Treatment 11 | 74000.00             | 79750.00             | 77000.00             | 74250.00             | 81000.00             |
| Treatment 12 | 81000.00             | 68250.00             | 78750.00             | 74500.00             | 89250.00             |

| Treatments  | 21 <sup>a</sup> Rep. | 22 <sup>a</sup> Rep. | 23 <sup>a</sup> Rep. | 24 <sup>a</sup> Rep. | 25 <sup>a</sup> Rep. |
|-------------|----------------------|----------------------|----------------------|----------------------|----------------------|
| Treatment 1 | 23250.00             | 21000.00             | 26250.00             | 22250.00             | 25000.00             |
| Treatment 2 | 20250.00             | 19250.00             | 21500.00             | 25500.00             | 25250.00             |
| Treatment 3 | 21000.00             | 20750.00             | 26750.00             | 24250.00             | 28500.00             |
| Treatment 4 | 167500.0             | 184750.0             | 165500.0             | 187500.0             | 159500.0             |
| Treatment 5 | 178250.0             | 180500.0             | 181750.0             | 172500.0             | 185250.0             |
| Treatment 6 | 182500.0             | 176500.0             | 179750.0             | 181500.0             | 167500.0             |

|              |                      |                      |                      |                      |                      |
|--------------|----------------------|----------------------|----------------------|----------------------|----------------------|
| Treatment 7  | 113750.0             | 127000.0             | 131250.0             | 121000.0             | 129000.0             |
| Treatment 8  | 136500.0             | 133000.0             | 118250.0             | 117750.0             | 126750.0             |
| Treatment 9  | 125250.0             | 121500.0             | 123000.0             | 113000.0             | 118250.0             |
| Treatment 10 | 76750.00             | 83250.00             | 70500.00             | 86250.00             | 73250.00             |
| Treatment 11 | 71250.00             | 74500.00             | 80750.00             | 78000.00             | 71000.00             |
| Treatment 12 | 73500.00             | 78500.00             | 75750.00             | 84250.00             | 73000.00             |
| =====        |                      |                      |                      |                      |                      |
| Treatments   | 26 <sup>a</sup> Rep. | 27 <sup>a</sup> Rep. | 28 <sup>a</sup> Rep. | 29 <sup>a</sup> Rep. | 30 <sup>a</sup> Rep. |
| -----        |                      |                      |                      |                      |                      |
| Treatment 1  | 21500.00             | 26500.00             | 24500.00             | 24750.00             | 29000.00             |
| Treatment 2  | 23750.00             | 25500.00             | 26500.00             | 22000.00             | 22750.00             |
| Treatment 3  | 26750.00             | 24000.00             | 26250.00             | 26500.00             | 21000.00             |
| Treatment 4  | 171750.0             | 172500.0             | 174250.0             | 170250.0             | 180000.0             |
| Treatment 5  | 175000.0             | 170250.0             | 176000.0             | 178500.0             | 172500.0             |
| Treatment 6  | 185250.0             | 177250.0             | 172500.0             | 171000.0             | 174250.0             |
| Treatment 7  | 116000.0             | 117750.0             | 118000.0             | 129500.0             | 115250.0             |
| Treatment 8  | 107750.0             | 111750.0             | 135000.0             | 115750.0             | 118000.0             |
| Treatment 9  | 123250.0             | 123750.0             | 115500.0             | 117000.0             | 113750.0             |
| Treatment 10 | 68750.00             | 82000.00             | 82750.00             | 71500.00             | 78750.00             |
| Treatment 11 | 73000.00             | 88750.00             | 79000.00             | 73750.00             | 80000.00             |
| Treatment 12 | 83000.00             | 69500.00             | 82750.00             | 73250.00             | 75250.00             |
| =====        |                      |                      |                      |                      |                      |

Descriptive treatments statistics :

| Treatments   | Average    | Variance   | SD         | SEM        |
|--------------|------------|------------|------------|------------|
| Treatment 1  | 23991.6667 | 7351221.26 | 2711.31357 | 495.015867 |
| Treatment 2  | 23391.6667 | 7119324.71 | 2668.20627 | 487.145588 |
| Treatment 3  | 23600.0000 | 12640517.2 | 3555.35051 | 649.115225 |
| Treatment 4  | 176541.667 | 64077945.4 | 8004.87011 | 1461.48264 |
| Treatment 5  | 179216.667 | 47291954.0 | 6876.91457 | 1255.54708 |
| Treatment 6  | 176675.000 | 28707543.1 | 5357.94206 | 978.221909 |
| Treatment 7  | 120200.000 | 40928448.3 | 6397.53455 | 1168.02466 |
| Treatment 8  | 122000.000 | 67465517.2 | 8213.73954 | 1499.61681 |
| Treatment 9  | 120950.000 | 22294827.6 | 4721.73989 | 862.067816 |
| Treatment 10 | 78683.3333 | 40340229.9 | 6351.39590 | 1159.60094 |
| Treatment 11 | 80266.6667 | 33072988.5 | 5750.91197 | 1049.96807 |
| Treatment 12 | 78475.0000 | 45919612.1 | 6776.40111 | 1237.19592 |

**Analysis of Variance**

|            | df  | SS           | MS           | F         | P-value  |
|------------|-----|--------------|--------------|-----------|----------|
| Treatments | 11  | 1.1439E^12   | 103998466840 | 2991.25** | < 0.0001 |
| Residual   | 348 | 1209909375   | 34767510.776 | -         | -        |
| Total      | 359 | 1.156082E^12 |              | -         | -        |

General Average.....: 100332.64  
 Standard deviation.....: 5896.3981  
 standard error of the mean...: 1076.5301  
 coefficient of variation.....: 5.8768494

**Comparison of means tests**

=====

Tukey test

| Treatment    | Variable 1 |   |
|--------------|------------|---|
| Treatment 5  | 179216.67  | a |
| Treatment 6  | 176675.00  | a |
| Treatment 4  | 176541.67  | a |
| Treatment 8  | 122000.00  | b |
| Treatment 9  | 120950.00  | b |
| Treatment 7  | 120200.00  | b |
| Treatment 11 | 80266.66   | c |
| Treatment 10 | 78683.333  | c |
| Treatment 12 | 78475.000  | c |
| Treatment 1  | 23991.667  | d |
| Treatment 3  | 23600.000  | d |
| Treatment 2  | 23391.667  | d |

-----

significant difference (5%) = 5009.6171

=====
